# Supplementary material for: The Effect of Acute Physical Exercise on NK-Cell Cytolytic Activity: A Systematic Review and Meta-Analysis
Source: Springer Nature journal article supplement (doi:10.1007/s40279-020-01402-9), 2021-01-04
Supplement: MOESM1 [file 18726432]

**Article title:** The effect of acute physical exercise on NK-cell cytolytic activity: A systematic review and meta-analysis

**Journal:** Sports Medicine

**Authors:** Christopher Rumpf, Sebastian Proschinger, Alexander Schenk, Wilhelm Bloch, Amit Lampit, Florian Javelle, and Philipp Zimmer

**Contact:** Philipp Zimmer, Institute of Sport and Sport Science, Technical University Dortmund, Germany, philipp.zimmer@tu-dortmund.de

## Electronic Supplementary Material (ESM)

ESM Table A. PEDro scale

| Study                | Eligibility criteria | Random allocation | Concealed allocation | Similar at baseline | Subjects blinded | Therapists blinded | Assessors blinded | >85% follow-up | intention-to-treat analysis | Between-group comparisons | Point and variability measures | Total PEDro score |
|----------------------|----------------------|-------------------|----------------------|---------------------|------------------|--------------------|-------------------|----------------|-----------------------------|---------------------------|--------------------------------|-------------------|
| Bouillon (2006) [22] | 1                    | 1                 | 0                    | 1                   | n/a              | n/a                | 0                 | 1              | 1                           | 1                         | 1                              | 6                 |
| Flynn (1999) [23]    | 1                    | 1                 | 0                    | 1                   | n/a              | n/a                | 0                 | 1              | 1                           | 1                         | 1                              | 6                 |
| Gannon (1998) [12]   | 1                    | 1                 | 0                    | 1                   | n/a              | n/a                | 0                 | 1              | 1                           | 1                         | 1                              | 6                 |
| Lee (2005) [27]      | 1                    | 1                 | 0                    | 1                   | n/a              | n/a                | 0                 | 1              | 1                           | 1                         | 1                              | 6                 |
| Moyna (1996) [31]    | 1                    | 1                 | 0                    | 1                   | n/a              | n/a                | 0                 | 1              | 1                           | 1                         | 1                              | 6                 |
| Strasner (1997) [25] | 1                    | 1                 | 0                    | 1                   | n/a              | n/a                | 0                 | 1              | 1                           | 1                         | 1                              | 6                 |
| McFarlin (2003) [28] | 1                    | 0                 | 0                    | 1                   | n/a              | n/a                | 0                 | 1              | 1                           | 1                         | 1                              | 5                 |
| Palmo (1995) [30]    | 1                    | 0                 | 0                    | 1                   | n/a              | n/a                | 0                 | 1              | 1                           | 1                         | 1                              | 5                 |
| Brenner (1999) [26]  | 1                    | 1                 | 0                    | 1                   | n/a              | n/a                | 0                 | 1              | 1                           | 1                         | 1                              | 6                 |
| Brenner (1996) [11]  | 1                    | 1                 | 0                    | 1                   | n/a              | n/a                | 0                 | 1              | 1                           | 1                         | 1                              | 6                 |
| McFarlin (2003) [28] | 1                    | 1                 | 0                    | 1                   | n/a              | n/a                | 0                 | 1              | 1                           | 1                         | 1                              | 6                 |
| Miles (2002) [29]    | 1                    | 1                 | 1                    | 1                   | n/a              | n/a                | 0                 | 1              | 1                           | 1                         | 1                              | 7                 |

Criteria (2-11) were used to calculate the total PEDro score. Each criterion was scored as either 1 or 0 according to whether the criteria was met or not. n/a = not applicable

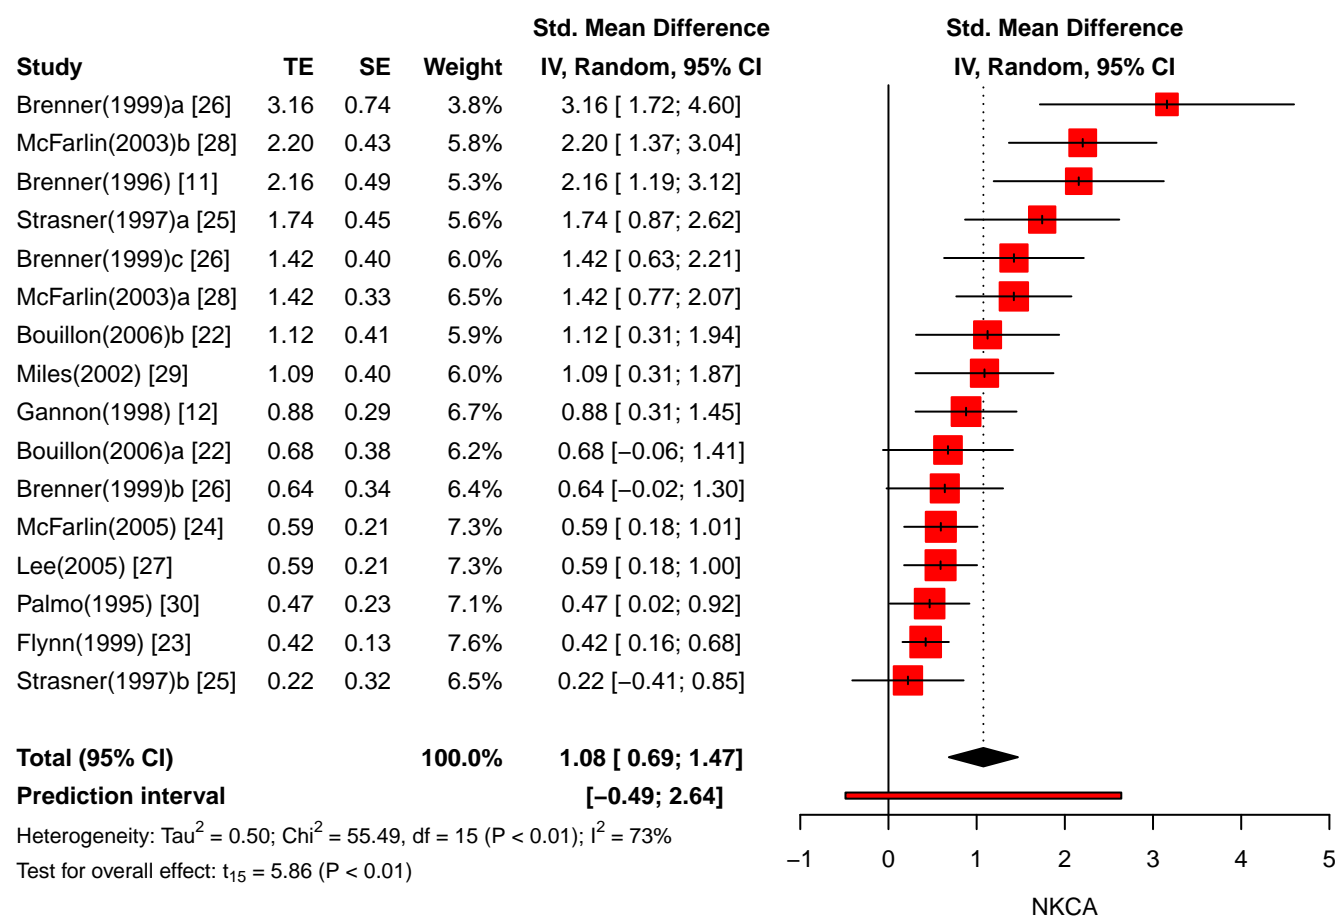

ESM Figure A. Forest plot of NKCA results (exercise versus control group) immediately after physical exercise (pre versus post) without outliers

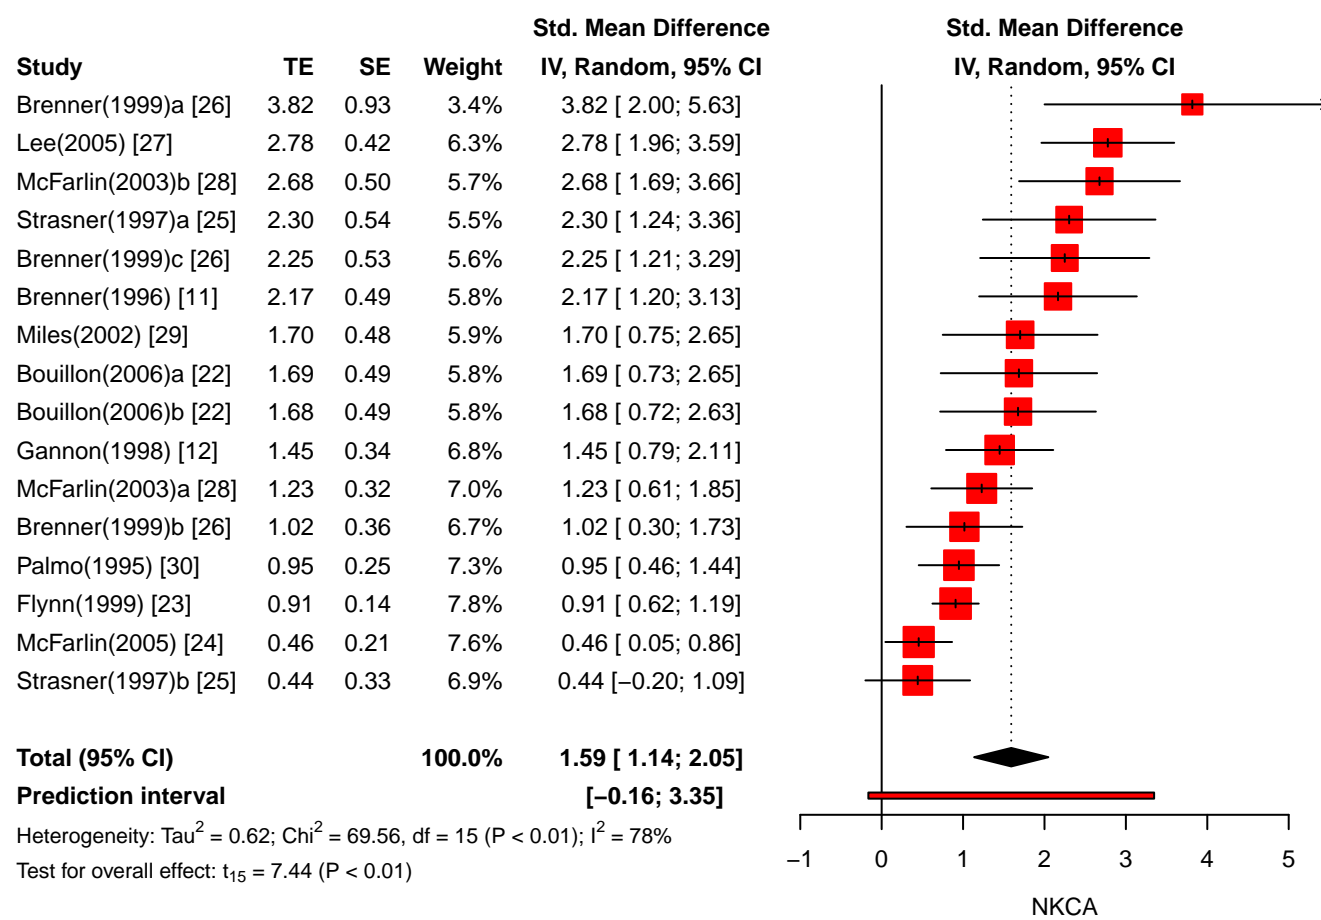

ESM Figure B. Forest plot of NKCA results in the exercise groups immediately after physical exercise (pre versus post)

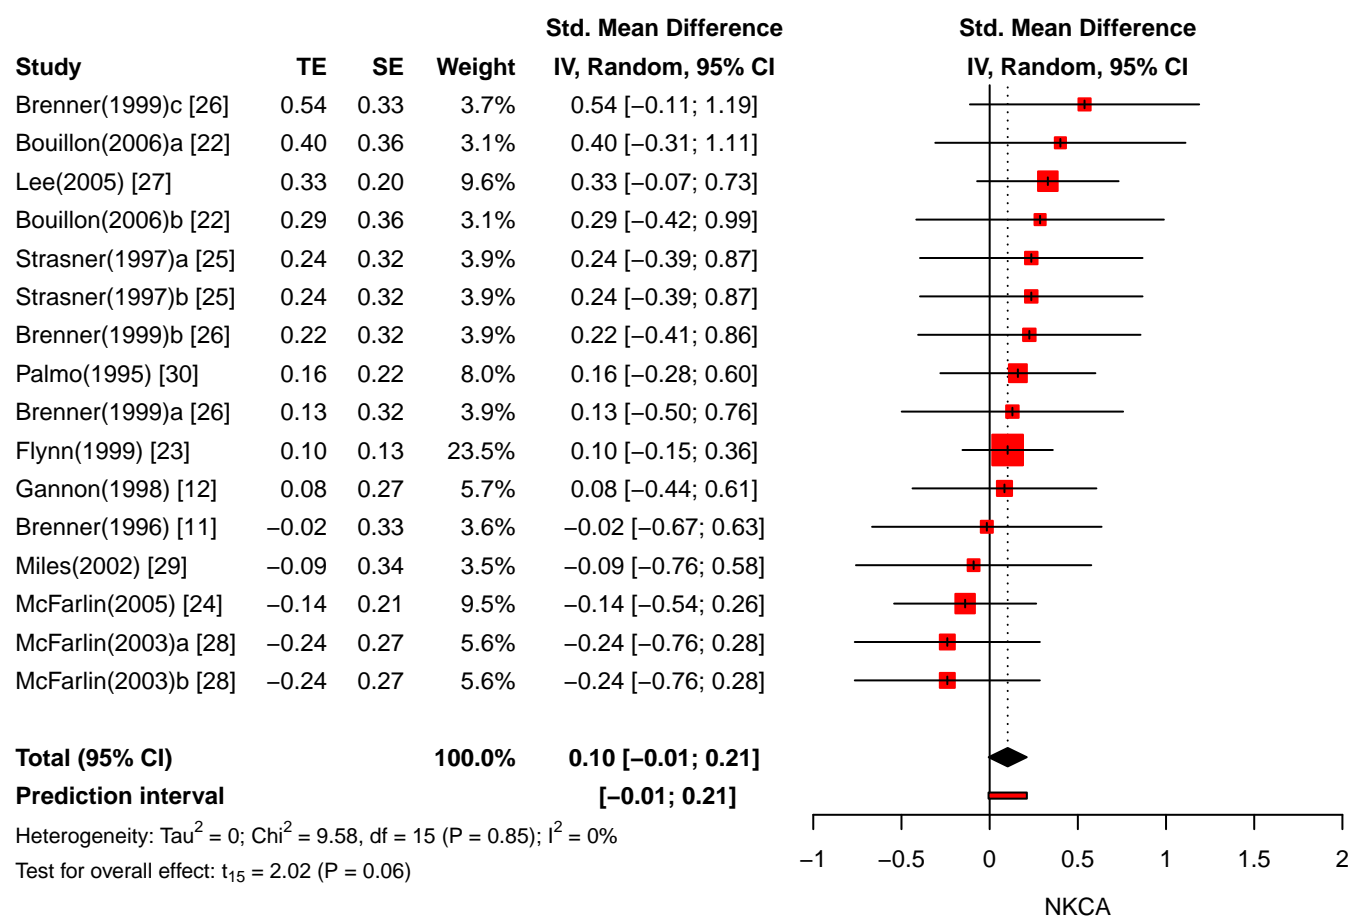

ESM Figure C. Forest plot of NKCA results in the control groups immediately after physical exercise (pre versus post)

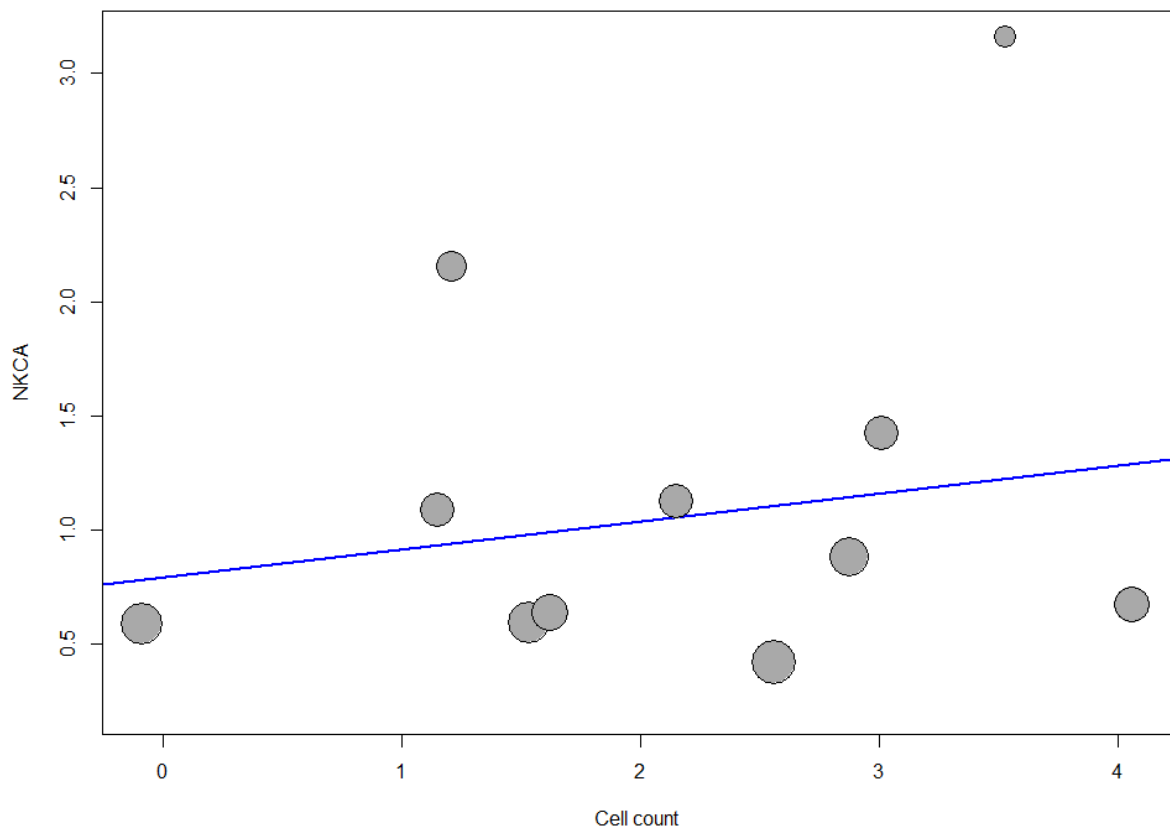

ESM Figure D. Bubble plot of meta-regression results immediately after physical exercise (pre versus post)

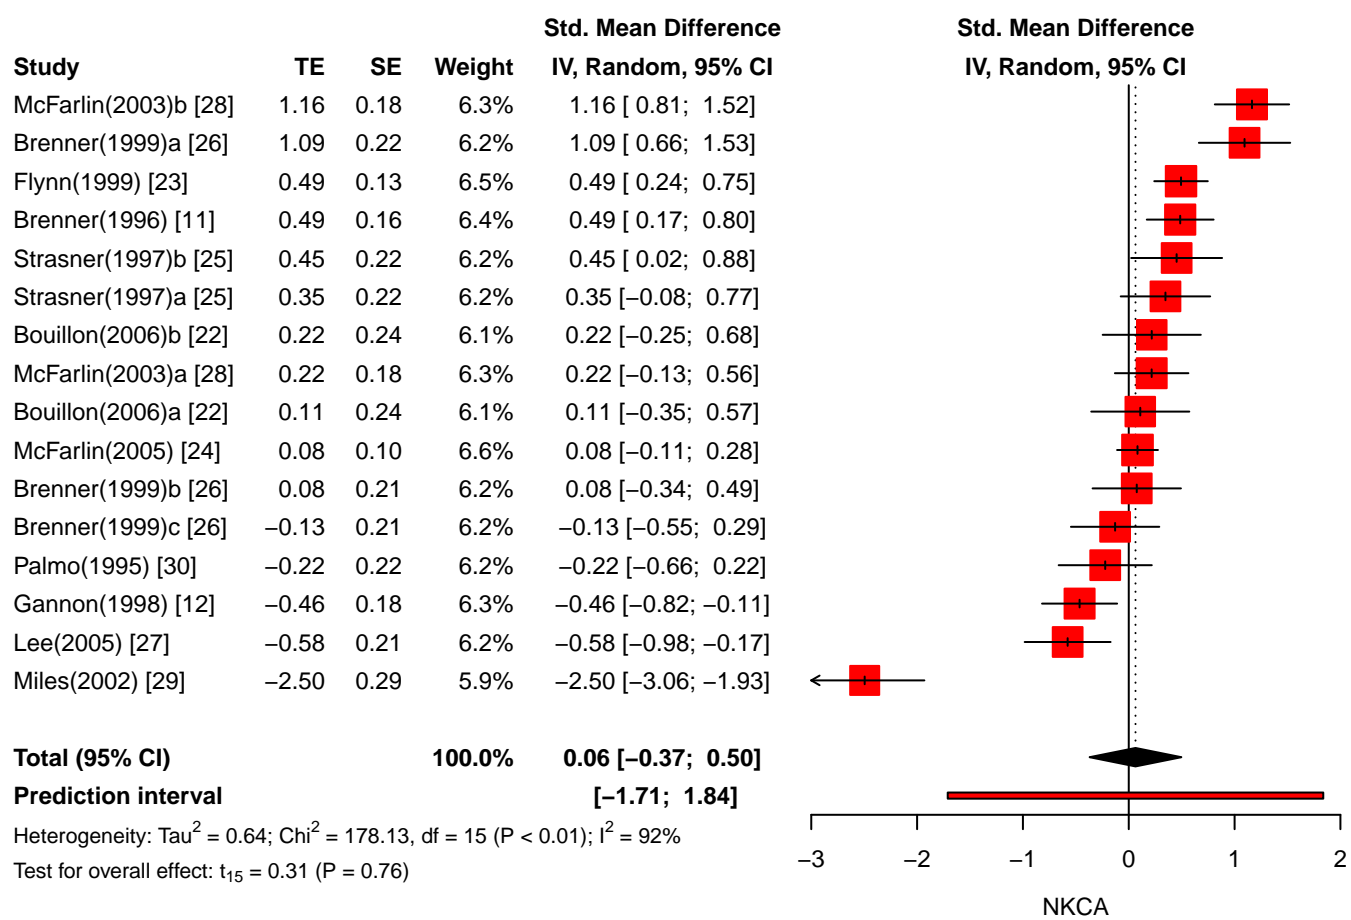

ESM Figure E. Forest plot of NKCA results in the exercise groups after the recovery period (pre versus recovery)
